# Supplementary material for: Small molecule inhibition of cGAS reduces interferon expression in primary macrophages from autoimmune mice
Source: PubMed Central journal article supplement (PMC5622107; doi:10.1038/s41467-017-00833-9), 2017-09-29
Supplement: 41467_2017_833_MOESM1_ESM.pdf [file 41467_2017_833_MOESM1_ESM.pdf]

### **Description of Supplementary Files**

File name: Supplementary Information

Description: Supplementary figures and supplementary tables.

File name: Peer review file

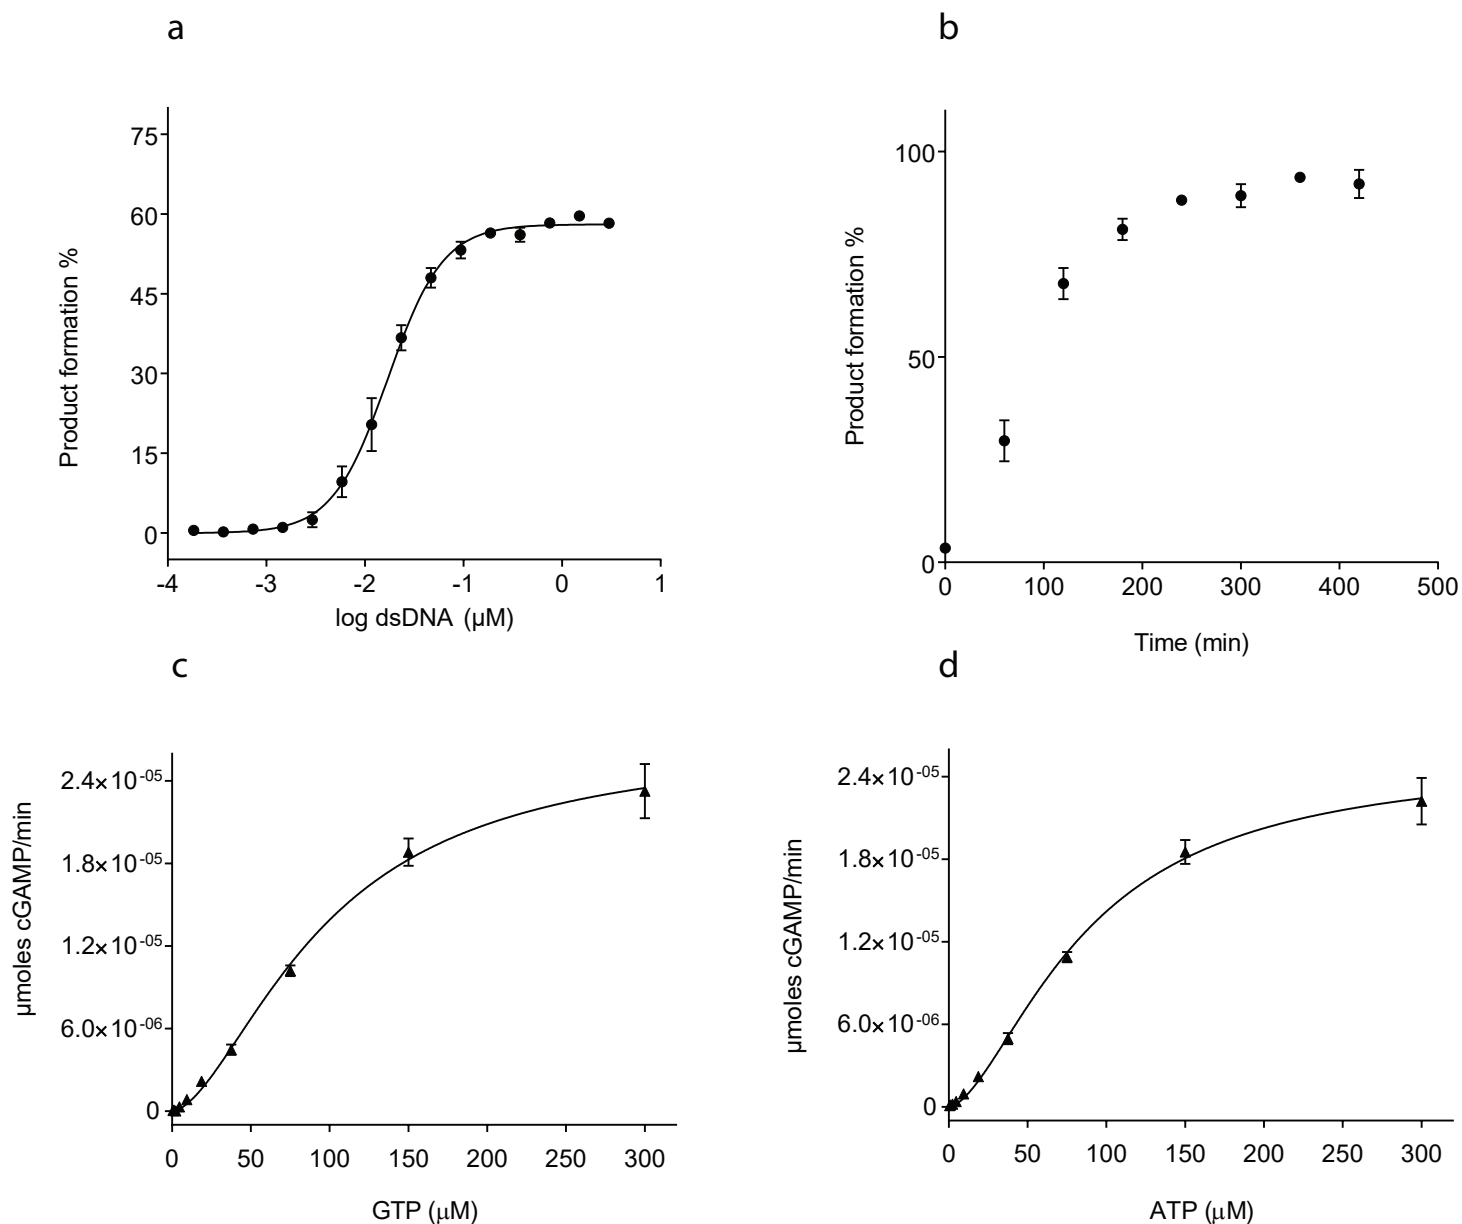

**Supplementary Fig. 1. Optimization and development of in vitro cGAS assay for high-throughput implementation.** (a) Activity of mouse cGAS determined by the RapidFire Mass Spectrometry system (RF-MS). The 50% effective concentration (EC50) of dsDNA calculated from Fig. 1b by fitting the area under the curve of the cGAMP molecular ion signal to a sigmoidal dose-response. (b) Formation of cGAMP monitored over time Using  $0.3 \mu\text{M}$  dsDNA. cGAS kinetics using RF-MSS. Substrate dependence of activity of mouse cGAS for ATP (c) and GTP (d). The inset table shows  $k_{\text{cat}}$  and  $K_m$  obtained for both substrates. The calculations were based on 3 different experiments and the curves are non-linear fits generated by GraphPad Prism.

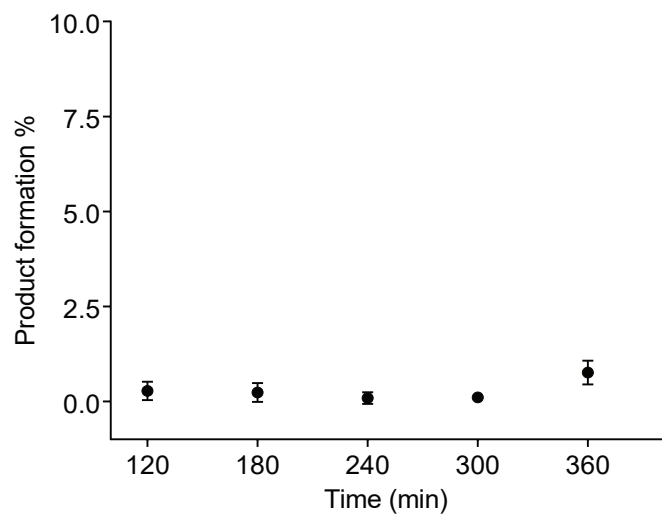

**Supplementary Fig 2.** Time course of h-cGAS using the same conditions used for the m-cGAS screen.

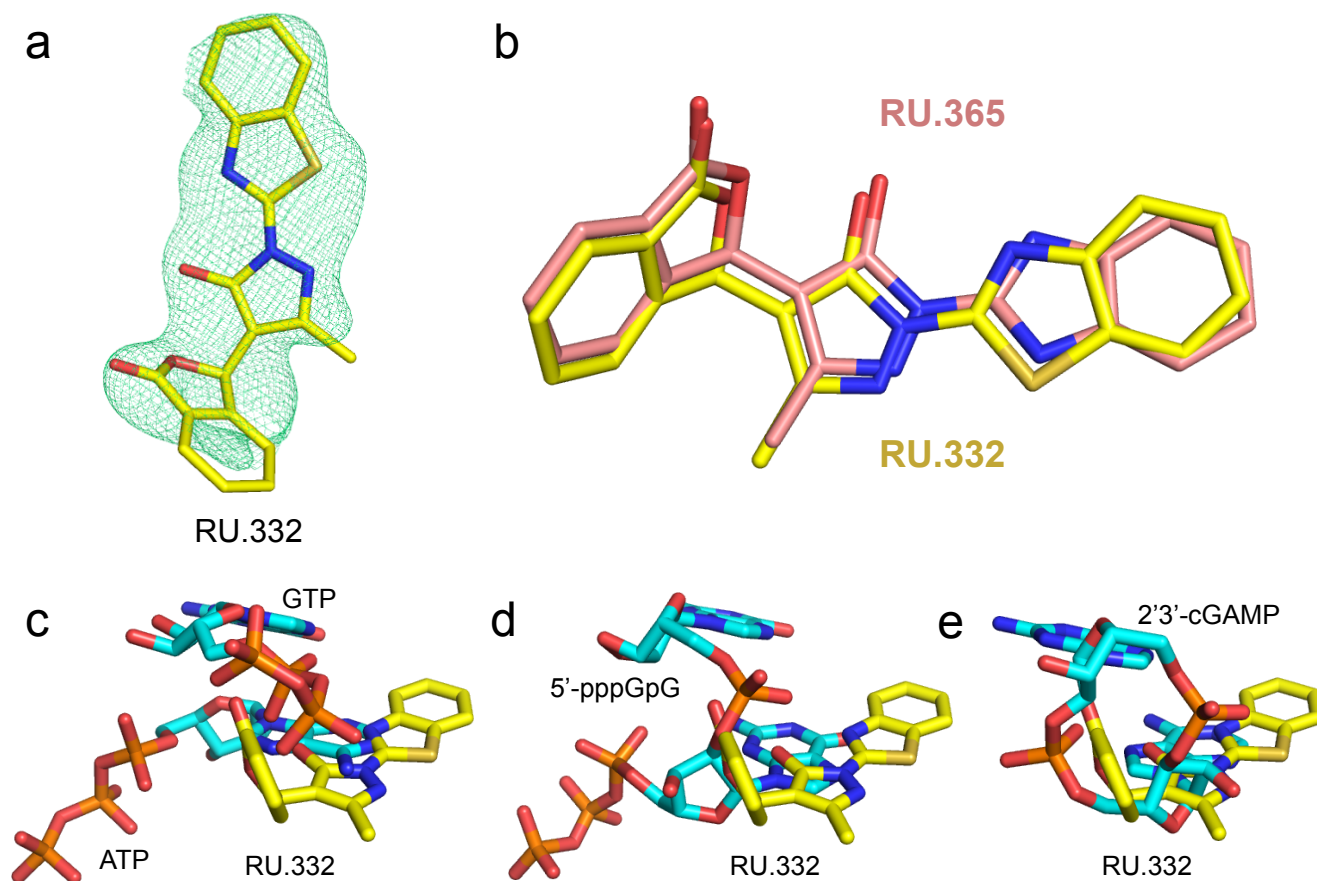

**Supplementary Fig. 3. A structural comparison of RU.365 with its analog RU.332. (a)** Omit Fo-Fc electron density (green mesh) of RU.332 contoured at  $3\sigma$ . **(b)** Superposition of structures of bound RU.365 (salmon) and RU.332 (yellow). Superposition of structures of bound RU.332 **(c-e)** with those of substrates, intermediate, and product. All the ligands are shown in stick representation. Inhibitors are shown in yellow. Substrates/Intermediate/Product are shown in cyan.

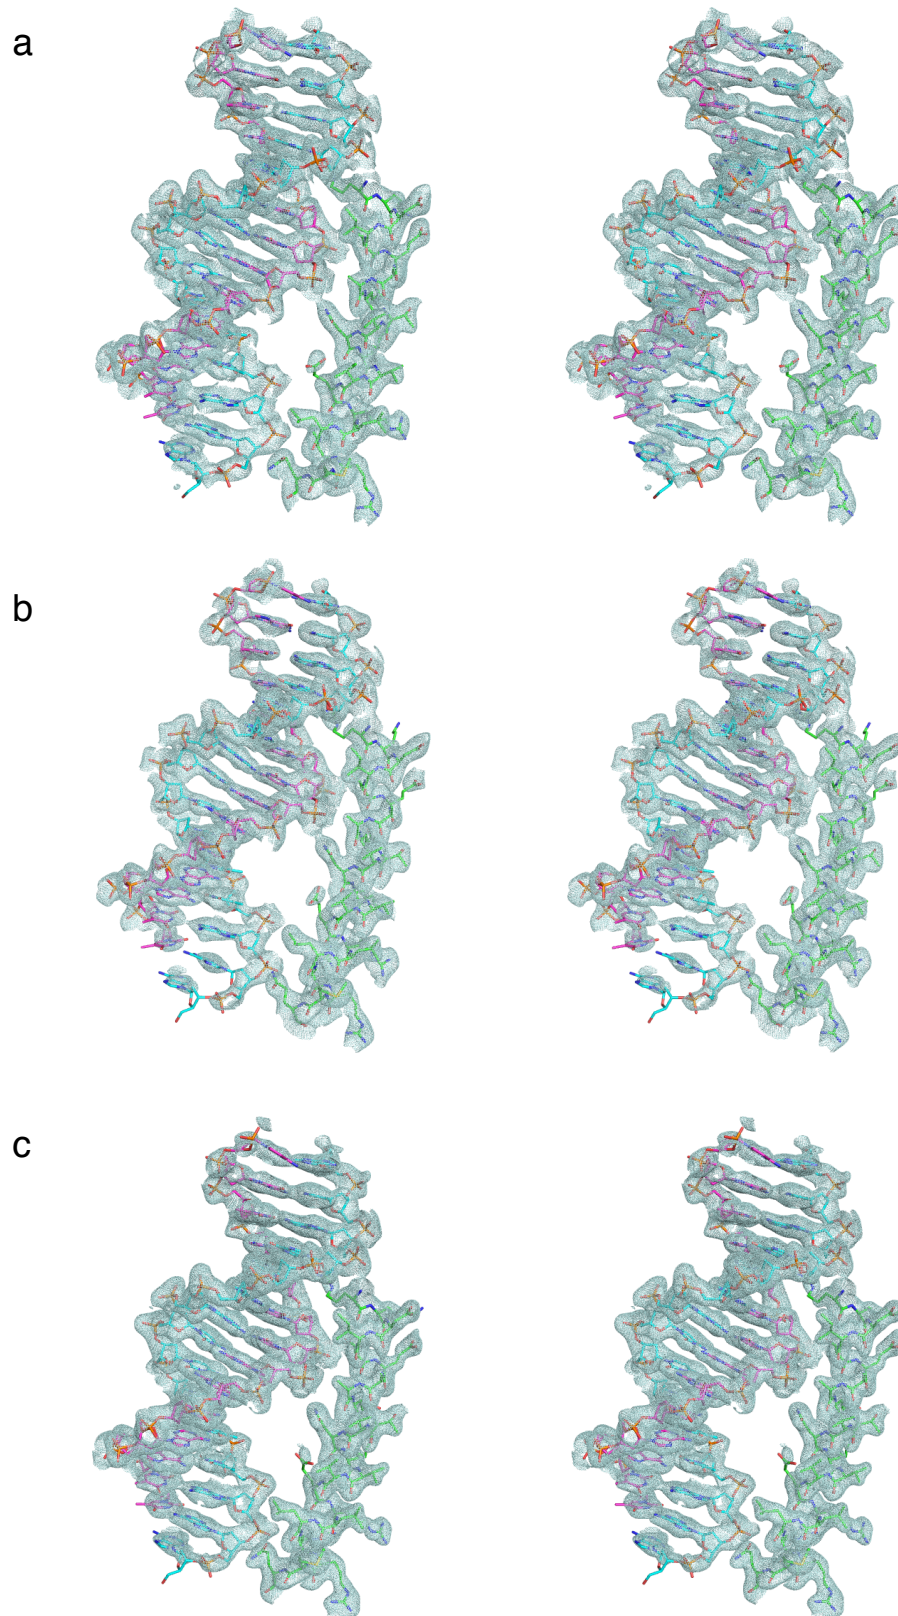

**Supplementary Fig. 4. Stereo views of the electron density maps of cGAS ternary complexes.** The stereo view of the 2Fo-Fc electron density map (gray) for cGAS (R161-Q183, green) and the bound DNA (cyan and purple) in the structures of cGAS-DNA-RU.365 (a), cGAS-DNA-RU.332 (b), and cGAS-DNA-RU.521 (c). The contour level of the map is 1.0.

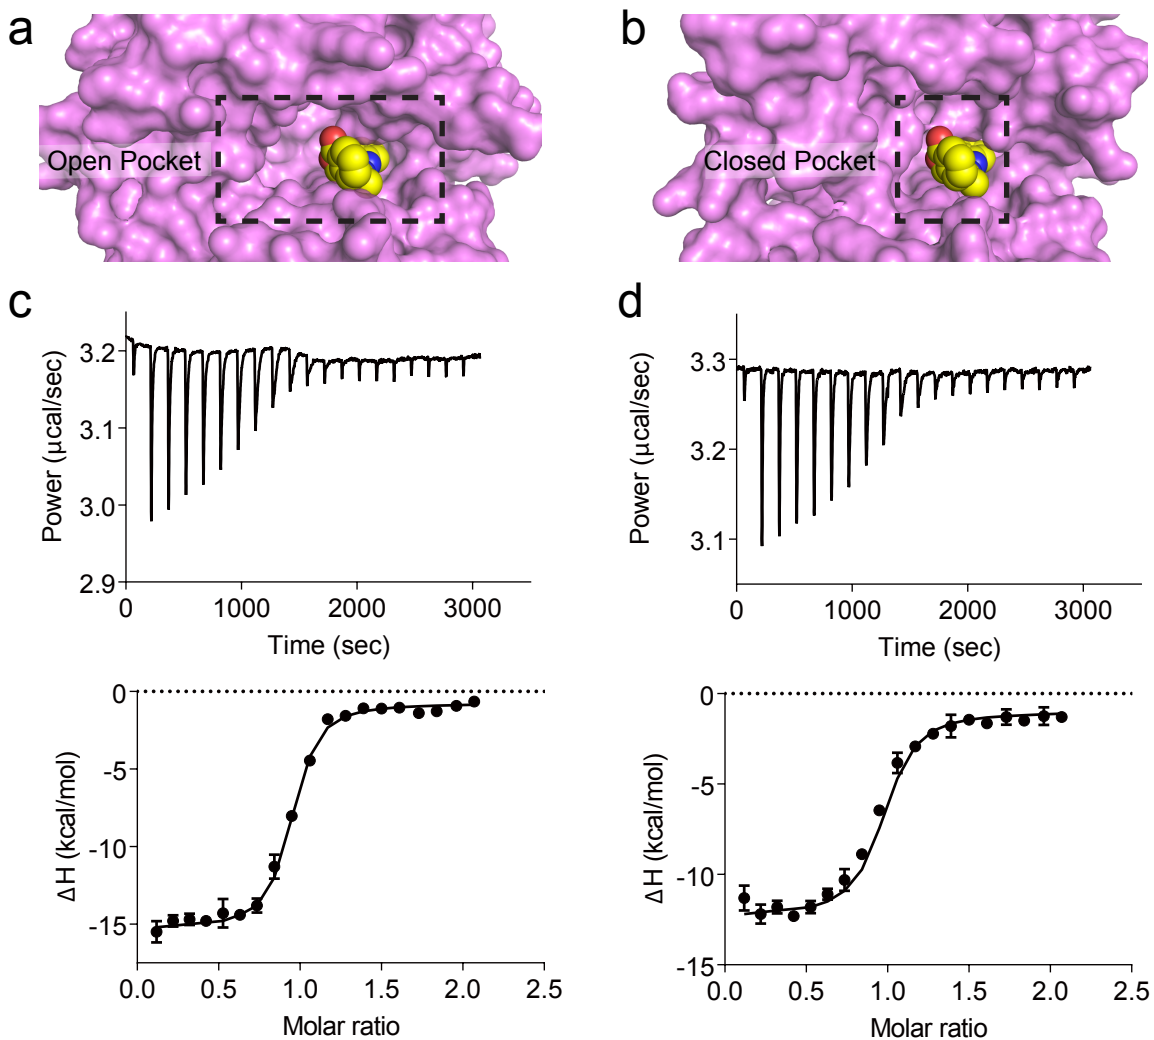

|                           | rM     | $K_d$<br>(nM) | $\Delta H$<br>(cal/mol) | $T^*\Delta S$<br>(cal/mol) | $\Delta G$<br>(cal/mol) |
|---------------------------|--------|---------------|-------------------------|----------------------------|-------------------------|
| cGAS in presence of dsDNA | 0.9075 | 64.09         | -14320                  | -4504                      | -9813                   |
| cGAS in absence dsDNA     | 0.9384 | 98.47         | -11070                  | -1511                      | -9559                   |

**Supplementary Fig. 5. Isothermal titration calorimetry binding curves for RU.365 and cGAS in the presence and absence of dsDNA.** (a) Structure of RU.365 bound to the "open pocket" of cGAS in the dsDNA-bound state. (b) Model of RU.365 bound to the "closed pocket" of cGAS in the dsDNA-free state. (c) RU.365 titrated into cGAS/dsDNA complex with 1 mM of ATP and (d) RU.365 titrated into cGAS/dsDNA complex with 1 mM of GTP. The table contains the dissociation constant and thermodynamic parameters.

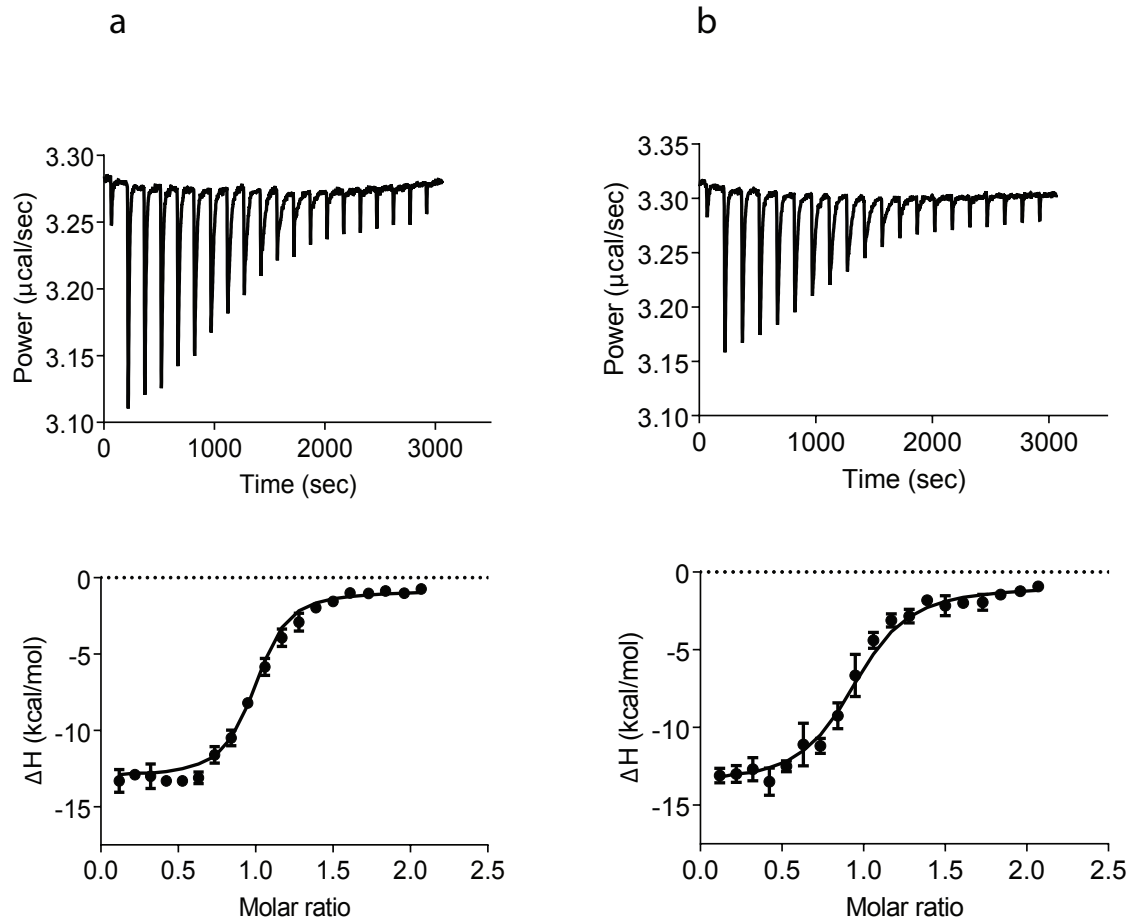

|                  | rM     | $K_d$<br>(nM) | $\Delta H$<br>(cal/mol) | $T^*\Delta S$<br>(cal/mol) | $\Delta G$<br>(cal/mol) |
|------------------|--------|---------------|-------------------------|----------------------------|-------------------------|
| cGAS/dsDNA + ATP | 0.9605 | 104.4         | -12020                  | -2493                      | -9524                   |
| cGAS/dsDNA + GTP | 0.9257 | 298.2         | -12570                  | -3668                      | -8902                   |

**Supplementary Fig. 6. Isothermal titration calorimetry binding curves to compare inhibitor binding to cGAS versus its natural substrates.** (a) RU.365 titration into cGAS/dsDNA complex with 1 mM of ATP and (b) RU.365 titration into cGAS/dsDNA complex with 1 mM of GTP. The table contains the dissociation constant and thermodynamic parameters.

a

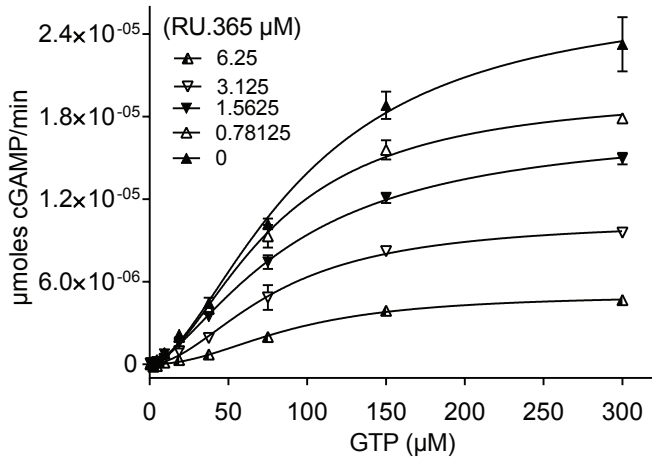

| RU.365 (μM)                                | 6.3                  | 3.2                  | 1.6                  | 0.8                  | 0                    |
|--------------------------------------------|----------------------|----------------------|----------------------|----------------------|----------------------|
| $V_{\max}^{\text{app}}$ (μmoles cGAMP/min) | $5.1 \times 10^{-6}$ | $1.1 \times 10^{-5}$ | $1.7 \times 10^{-5}$ | $2.0 \times 10^{-5}$ | $2.7 \times 10^{-5}$ |
| $K_m^{\text{app}}$ (μM)                    | 89.4                 | 79.7                 | 89.7                 | 77.8                 | 96.4                 |
| $k_{\text{cat}}$ (min <sup>-1</sup> )      | 4.3                  | 9.1                  | 14                   | 17                   | 23                   |

b

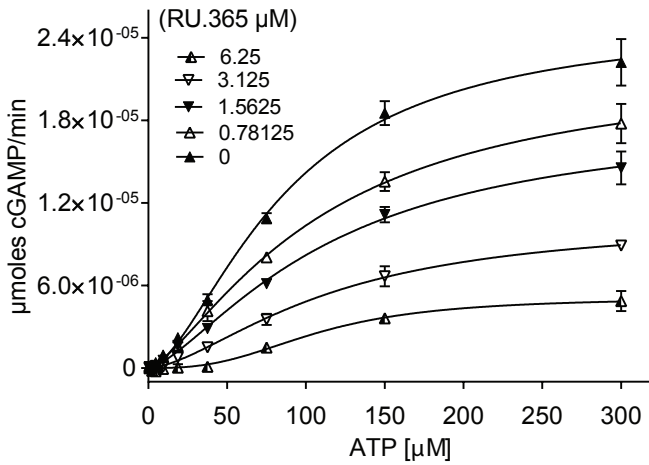

| RU.365 (μM)                                | 6.3                  | 3.2                  | 1.6                  | 0.8                  | 0                    |
|--------------------------------------------|----------------------|----------------------|----------------------|----------------------|----------------------|
| $V_{\max}^{\text{app}}$ (μmoles cGAMP/min) | $5.1 \times 10^{-6}$ | $1.1 \times 10^{-5}$ | $1.8 \times 10^{-5}$ | $2.2 \times 10^{-5}$ | $2.5 \times 10^{-5}$ |
| $K_m^{\text{app}}$ (μM)                    | 107.3                | 113.4                | 115.5                | 109.1                | 86.0                 |
| $k_{\text{cat}}$ (min <sup>-1</sup> )      | 4.3                  | 9.1                  | 14                   | 17                   | 23                   |

**Supplementary Fig 7. Kinetics of m-cGAS in the presence and absence of RU.365** (a) Progress curves of m-cGAS varying GTP at fixed concentration of ATP, table on the right shows the values for  $K_m^{\text{app}}$ ,  $V_{\max}$  and  $k_{\text{cat}}$ . (b) Progression curves of m-cGAS varying ATP at fixed concentration of GTP, table on the right shows the values for  $K_m^{\text{app}}$ ,  $V_{\max}$  and  $k_{\text{cat}}$  determined by the RapidFire Mass Spectrometry system (RF-MS).



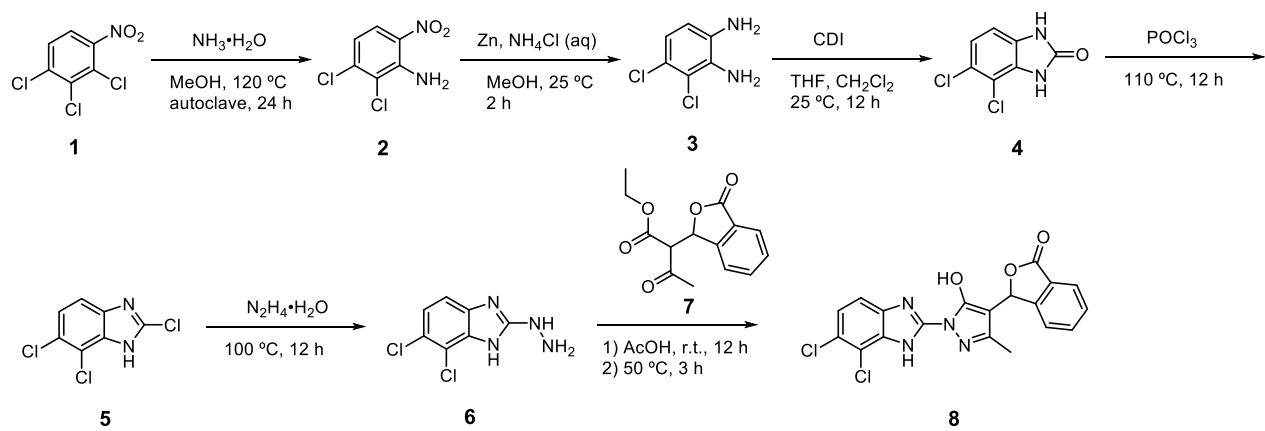

**Supplementary Fig. 8. Synthesis of RU.521.** Chemical synthesis scheme depicting the synthesis of RU320521 (RU.521).

**Supplementary Table 1. cGAS high-throughput small molecule screening data summary**

| <b>Category</b>    | <b>Parameter</b>                                                                                                                                                                                                                                                                                                                                                                                                                                                                                                                  | <b>Description</b>                                                                                                                                                                                                                                                                                                                                                                                                                                                                                                                                                                                                                                                                                                                                                            |
|--------------------|-----------------------------------------------------------------------------------------------------------------------------------------------------------------------------------------------------------------------------------------------------------------------------------------------------------------------------------------------------------------------------------------------------------------------------------------------------------------------------------------------------------------------------------|-------------------------------------------------------------------------------------------------------------------------------------------------------------------------------------------------------------------------------------------------------------------------------------------------------------------------------------------------------------------------------------------------------------------------------------------------------------------------------------------------------------------------------------------------------------------------------------------------------------------------------------------------------------------------------------------------------------------------------------------------------------------------------|
| Assay              | Type of assay                                                                                                                                                                                                                                                                                                                                                                                                                                                                                                                     | Purified enzyme assay                                                                                                                                                                                                                                                                                                                                                                                                                                                                                                                                                                                                                                                                                                                                                         |
|                    | Target                                                                                                                                                                                                                                                                                                                                                                                                                                                                                                                            | Mouse Cyclic GMP-AMP Synthase (m-cGAS)                                                                                                                                                                                                                                                                                                                                                                                                                                                                                                                                                                                                                                                                                                                                        |
|                    | Primary measurement                                                                                                                                                                                                                                                                                                                                                                                                                                                                                                               | Mass spectrometry                                                                                                                                                                                                                                                                                                                                                                                                                                                                                                                                                                                                                                                                                                                                                             |
|                    | Key reagents                                                                                                                                                                                                                                                                                                                                                                                                                                                                                                                      | m-cGAS, ATP, GTP, dsDNA                                                                                                                                                                                                                                                                                                                                                                                                                                                                                                                                                                                                                                                                                                                                                       |
|                    | Assay protocol                                                                                                                                                                                                                                                                                                                                                                                                                                                                                                                    | 20 $\mu$ L final volume: Buffer of the reaction containing 20 mM Tris-HCl pH 7.4, 150 mM NaCl, 5mM MgCl <sub>2</sub> , 1mM DTT and 0.01% Tween-20. Samples contains buffer of the reaction, 300 $\mu$ M ATP and GTP, 300 nM dsDNA and 60 nM cGAS incubated for 120 min at room temperature. The reaction was stopped with 65 $\mu$ L formic acid 0.5%. Samples were analyzed in RF-MSS. Order of addition: 5 $\mu$ L of reaction buffer, 0.05 $\mu$ L compounds, 10 $\mu$ L of a mix of ATP, GTP and dsDNA (columns 1-23), 10 $\mu$ L of a reaction containing ATP, GTP (column 24), 5 $\mu$ L solution containing cGAS (full plate). The plates were spun down for 30 seconds at 180 x g. After 120 min at room temperatures the reaction was stopped with formic acid 0.5%. |
| Additional comment | Samples were analyzed using RF-MSS. The load/wash solvent was water containing 5 mM ammonium acetate, pH 10 (solvent A). The elution solvent was 50% water, 25% acetone and 25 % acetonitrile containing 5 mM ammonium acetate, pH 10 (solvent B). Approximately 35 $\mu$ L of samples were injected to a Graphitic carbon cartridge (Type D). Once the sample was loaded into the cartridge a wash step of 4000 ms at 1.5 mL/min was performed to remove buffer salts. To elute the analytes of interest (ATP, GTP and cGAMP) an |                                                                                                                                                                                                                                                                                                                                                                                                                                                                                                                                                                                                                                                                                                                                                                               |

|         |                                    |                                                                                                                                                                                                                           |
|---------|------------------------------------|---------------------------------------------------------------------------------------------------------------------------------------------------------------------------------------------------------------------------|
|         |                                    | elution step of 5000 ms with buffer B was performed at a flow rate of 1.5 mL/min. The cartridge was after re-equilibrated with solvent A for 5000 ms at a flow rate of 1.5 mL/min.                                        |
| Library | Library size                       | 123,306 pure compounds                                                                                                                                                                                                    |
|         | Library composition                | Low molecular weight compounds were a random subset from the Rockefeller University Compound Library of 283,000 compounds                                                                                                 |
|         | Source                             | ChemDiv, Spectrum, Prestwick, Enamine, Pharmakon-900, LifeChem, Specs, Chiral Center Diversity Library, NIH Clinical Collection, Tocris, Biofocus, HTSRC Clinical Collection, Cerep, Chembridge, AMRI, Analyticon, ChemX. |
|         | Additional comments                | Library description <a href="http://www.rockefeller.edu/htsrc/">www.rockefeller.edu/htsrc/</a>                                                                                                                            |
| Screen  | Format                             | 384-well plate                                                                                                                                                                                                            |
|         | Concentration tested               | 12.5 $\mu$ M; 0.25% DMSO                                                                                                                                                                                                  |
|         | Plate controls                     | DMSO (negative control), no dsDNA (positive control)                                                                                                                                                                      |
|         | Reagent/compound dispensing system | MultiDrop Combi with RapidStack (Thermo Scientific) for reagents; Janus Automated Workstation with Nanohead (Perkin-Elmer) for compounds.                                                                                 |
|         | Detection instrument and           | RapidFire Mass Spectrometry System (Agilent);                                                                                                                                                                             |

|                   |                                                                                                                            |                                                                                                                                                                                                                                                                                                                                                                                                                                                                                                                                                                                                                                                                                                                                                                                                                                                                                                                                                                                                                                                                                                                                                                                                                                                                                                                                                                                                                                                                                        |
|-------------------|----------------------------------------------------------------------------------------------------------------------------|----------------------------------------------------------------------------------------------------------------------------------------------------------------------------------------------------------------------------------------------------------------------------------------------------------------------------------------------------------------------------------------------------------------------------------------------------------------------------------------------------------------------------------------------------------------------------------------------------------------------------------------------------------------------------------------------------------------------------------------------------------------------------------------------------------------------------------------------------------------------------------------------------------------------------------------------------------------------------------------------------------------------------------------------------------------------------------------------------------------------------------------------------------------------------------------------------------------------------------------------------------------------------------------------------------------------------------------------------------------------------------------------------------------------------------------------------------------------------------------|
|                   | <p>software</p> <p>Assay Validation /QC</p> <p>Correction factors</p> <p>Normalization data</p> <p>Additional comments</p> | <p>Agilent Mass Hunter WorkStation software.<br/>RapidFire Integrator software.</p> <p>Hit-compounds were re picked from the original 5 mM source and retested at 10 serial diluted concentrations; in triplicate and a concentration response curved fitted to a 4 parameter hyperbolic using CDD software. HPLC performed to all hits compounds to detect purity.</p> <p>none</p> <p>The % inhibition is calculates as follows: % inhibition = 100 x (sample - average negative control)/(average positive control - average negative control)]. The quality of the screen was assessed by Z' factor calculated as follows: <math>Z' = 1 - [3 * (\text{standard deviation positive control} + \text{standard deviation negative control}) / (\text{average positive control} - \text{average negative control})]</math>. Catalytic rates expressed as percent product formation were calculated using the AUC of cGAMP and using the AUC's of ATP and GTP to normalize for variations in the capacity of the solid phase extraction column during a screening run, as shown in the following formula: product formation (%) = <math>[(\text{AUC}_{\text{cGAMP}} \times 100) / (\text{AUC}_{\text{cGAMP}} + \frac{1}{2} \text{AUC}_{\text{ATP}} + \frac{1}{2} \text{AUC}_{\text{GTP}})]</math>, where AUC: area under the curve.</p> <p>To determine the percentage of inhibition of m-cGAS the data was normalized against the positive control (column 24) and negative control</p> |
| Post-HTS analysis | <p>Hit criteria</p> <p>Hit rate</p>                                                                                        | <p>Normalized percentage of inhibition <math>\geq 60\%</math></p> <p>0.19%</p>                                                                                                                                                                                                                                                                                                                                                                                                                                                                                                                                                                                                                                                                                                                                                                                                                                                                                                                                                                                                                                                                                                                                                                                                                                                                                                                                                                                                         |

|  |                                          |                                                                                                          |
|--|------------------------------------------|----------------------------------------------------------------------------------------------------------|
|  | Additional assays                        | Isothermal titration calorimetry (ITC)                                                                   |
|  | Confirmation of hit purity and structure | LC-MS; powders re-ordered and independently synthesized and re-tested in concentration – response curves |
|  | Additional comments                      | All hits compounds reported were at least 85% pure by LC-MS.                                             |

**Supplementary Table 2. 49 compounds selected with IC<sub>50</sub> < 10 μM and HPLC-MS ≥85%**

| Molecule identifier | CXSMILES                                                                                                                                     | Vendor                         | % inhibition at 12.5 μM | IC <sub>50</sub> (μM) | Polarization (mP) | % intercalation at 30 μM |
|---------------------|----------------------------------------------------------------------------------------------------------------------------------------------|--------------------------------|-------------------------|-----------------------|-------------------|--------------------------|
| RU100840            | <chem>O=C1NC2=C(C=CC=C2)C1=C1SC(=NC1=O)N1CCCCC1</chem><br> c:5,7,14,t:3                                                                      | Enamine                        | 88                      | 0.06                  | 269               | -8.9                     |
| RU107796            | <chem>NC1=C(C#N)C(C2=CC=C(C=C2)N(=O)=O)C(C#N)=C(N)S1</chem><br> c:1,8,10,t:6,18                                                              | Enamine                        | 62                      | 8.66                  | 266               | -7.6                     |
| RU114757            | <chem>C1CC(=O)NC1=NC(=CS1)C1=CNC2=C(C=CC=C12</chem><br> c:7,16,t:5,11,14,18                                                                  | Enamine                        | 72                      | 5.38                  | 271               | -10.1                    |
| RU116287            | <chem>FC1=C(C=C2SC(=S)NC2=O)C=CC=C1</chem><br> w:3.2,c:1,12,14                                                                               | Enamine                        | 63                      | 6.51                  | 271               | -9.8                     |
| RU1535              | <chem>OC(=O)COC1=CC(Cl)=C(Cl)C=C1Cl</chem><br> c:11,t:5,8                                                                                    | Spectrum                       | 98                      | 0.55                  | 244               | 3.4                      |
| RU161               | <chem>OC1=C(CC2=C(Cl)C(Cl)=CC(Cl)=C2O)C(Cl)=C(Cl)C=C1Cl</chem><br> c:1,4,8,11,19,t:16                                                        | Spectrum                       | 93                      | 0.39                  | 108               | 69.6                     |
| RU162145            | <chem>COC1=C2C(=O)C3=C(C(O)=C4C[C@](O)(C[C@H](O[C@H]5C[C@H](N)[C@@H](O)[C@H](C)O5)C4=C3O)C(=O)CO)C(=O)C2=CC=C1</chem><br> c:2,28,39,41,t:6,9 | Sequoia Research Products Ltd. | 98                      | 0.58                  | 53                | 96.5                     |
| RU166365            | <chem>CC1=NN(C2=NC3=CC=CC=C3N2)C(O)=C1C1OC(=O)C2=C1C=CC=C2</chem><br> c:8,10,16,23,26,28,t:1,4,6                                             | ChemBridge                     | 99                      | 0.52                  | 264               | -6.7                     |
| RU1667              | <chem>CCOC1=CC=C2N=C3C=C(N)C=CC3=C(N)C2=C1</chem><br> c:12,19,t:3,5,7,9,15                                                                   | Spectrum                       | 92                      | 1.01                  | 139               | 54.5                     |
| RU169196            | <chem>CCC1=NN2C(S1)=NC(=O)\C=C/C1=CC=C(O)C=C1)C2=N</chem><br> c:7,18,t:2,13,15                                                               | ChemBridge                     | 89                      | 4.25                  | 266               | -7.5                     |
| RU169248            | <chem>CCC1=NN2C(S1)=NC(=O)\C=C/C1=CC=C(S1)C2=N</chem><br> c:7,15,t:2,13                                                                      | ChemBridge                     | 97                      | 3.34                  | 262               | -5.7                     |

|          |                                                                                        |                                |    |        |     |       |
|----------|----------------------------------------------------------------------------------------|--------------------------------|----|--------|-----|-------|
| RU171395 | CC1=CC=C(C=C1)C(=O)C1=NC2=C(CCC2)N1O<br> c:3,5,t:1,10,12                               | ChemBridge                     | 90 | 0.25   | 251 | -0.3  |
| RU173673 | O=C1N=C(NC2=NC=CS2)S\C1=C/C1=C<br>C=CC(=C1)N(=O)=O<br> c:7,17,19,t:2,5,15              | LifeChem                       | 84 | < 0.04 | 275 | -11.7 |
| RU174368 | CC1=NN=C(NC(=O)C2=CC=C(O2)S(=O)(=O)NC2=CC=CC(=C2)C(F)(F)F)S1<br> c:10,20,22,t:1,3,8,18 | LifeChem                       | 76 | 7.47   | 239 | 5.6   |
| RU185491 | CC(C)C1=CC2=C(O)C3=C(C=C(C(O)=O)C(N)=N3)C2=O)C=C1<br> c:16,22,t:3,5,8,10               | Sequoia Research Products Ltd. | 65 | 9.43   | 248 | 1.5   |
| RU187170 | NC(=O)N1C(=O)\C(=C(O)C2=CC=CS2)C2=CC(Cl)=CC=C1<br>2  c:11,18,t:9,15,20                 | Tocris                         | 70 | 6.09   | 276 | -12.4 |
| RU187299 | OC1=C(I)C=C(C=C1N(=O)=O)C#N<br> c:1,4,6                                                | Enamine                        | 95 | 0.58   | 256 | -2.8  |
| RU187339 | O=C(NC1=NC=C(S1)N(=O)=O)C1=CC=CS1<br> c:5,14,t:3,12                                    | Vitas M Labs                   | 86 | 6.62   | 274 | -11.2 |
| RU187428 | NC(=N)NN=C1C=C(C=C1)=NNC(N)=S<br> c:6,9                                                | Vitas M Labs                   | 79 | 9.93   | 164 | 42.6  |
| RU191669 | BrC1=CC=CC=C1N1C=C(N=N1)C(=O)N<br>C1=NN=CS1<br> c:3,5,9,11,19,t:1,17                   | Enamine                        | 71 | 9.09   | 253 | -1.0  |
| RU191752 | OC1=CC=CN=C1N<br>C(=O)COC1=C2C=CC=CC2=C(Cl)C=C1<br> c:3,5,13,15,17,23,t:1,20           | Enamine                        | 95 | 0.17   | 276 | -12.4 |
| RU198755 | FC1=CC=CC2=C1S(=O)(=O)C\C(=C/C1=CC=C(C=C1)C#N)C2=O<br> c:3,5,16,18,t:1,14              | Enamine                        | 63 | 6.33   | 263 | -6.2  |
| RU199    | COC(=O)C1=C(C)N(C(C)=C(C1C1=CC=CC=C1N(=O)=O)C(=O)OC<br> c:4,9,15,17,t:13               | Spectrum                       | 91 | 0.80   | 260 | -4.4  |
| RU207450 | O=C1CN2C(NC(=O)C3=C2C2=CC=CC=C2S3)=C1C1=CC=C                                           | Enamine                        | 70 | 9.69   | 274 | -11.2 |

|          |                                                                                                                                 |                                |    |      |     |       |
|----------|---------------------------------------------------------------------------------------------------------------------------------|--------------------------------|----|------|-----|-------|
|          | C=C1<br> c:8,13,15,19,24,26,t<br>:11,22                                                                                         |                                |    |      |     |       |
| RU207488 | CS(=O)(=O)C1=NC=C2N3C(=O)C4=CC=CC=C4NC3=C(C#N)C(=O)C2=N1<br> c:13,15,27,t:4,6,11,20                                             | Enamine                        | 67 | 4.68 | 272 | -10.2 |
| RU209189 | COC(=O)C1=NN2C(N1)=NS(=O)(=O)C1=CC=CC=C21<br> c:9,16,t:4,14,18                                                                  | Enamine                        | 91 | 4.44 | 251 | 0.0   |
| RU219771 | OCC1=CN(N=N1)C1=CC=CC=C1Cl<br> c:5,10,12,t:2,8                                                                                  | Enamine                        | 94 | 1.27 | 253 | -1.3  |
| RU234543 | OC[C@H]1CCCN1C1=CC=C(C=C1)C1=NC(CCN2C=CC=N2)=CC(=O)N1<br> c:11,13,22,24,26,t:9,16                                               | ChemBridge                     | 89 | 6.76 | 270 | -9.3  |
| RU24114  | COC1=C2C(=O)C3=C(C(O)=C4C[C@](O)(C[C@H](O)[C@H]5C[C@H](N)[C@H](O)[C@H](C)O5)C4=C3O)C(=O)CO)C(=O)C2=CC=C1<br> c:2,28,39,41,t:6,9 | Sequoia Research Products Ltd. | 96 | 0.82 | 53  | 96.8  |
| RU24146  | COC1=CC=CC2=C1C(=O)C1=C(O)C3=C(C[C@](O)(C[C@H]3OC3CC(N)C(O)C(C)O3)C(C)=O)C(O)=C1C2=O<br> c:4,6,11,37,t:2,14                     | LightBiologicals               | 93 | 0.69 | 55  | 95.7  |
| RU297    | OC1=CC=C(C=C1N(=O)=O)[As](O)(O)=O<br> c:3,5,t:1                                                                                 | Spectrum                       | 96 | 1.37 | 271 | -9.8  |
| RU316    | CCN(CC)CCCC(C)N1C1=C2C=C(OC)C=CC2=NC2=CC(Cl)=CC=C12<br> c:11,17,20,25,t:13,22,27                                                | Spectrum                       | 68 | 6.22 | 140 | 54.0  |
| RU3433   | C1C1=C(SC2=CC=C(C=C12)C1=NNC(=S)O1<br> c:6,t:1,4,8,12                                                                           | Enamine                        | 92 | 6.12 | 288 | -18.4 |
| RU431    | NC1=C2C=CC=CC2=NC2=CC=CC=C12<br> c:1,3,5,8,12,t:10,14                                                                           | Spectrum                       | 78 | 2.83 | 145 | 51.5  |
| RU4893   | CCOC(=O)C1=NNC2=C1C(=O)N(CC)C2                                                                                                  | ChemDiv                        | 62 | 6.42 | 254 | -1.4  |



|         |                                                                                                                                                                                                                                        |                                |    |      |     |       |
|---------|----------------------------------------------------------------------------------------------------------------------------------------------------------------------------------------------------------------------------------------|--------------------------------|----|------|-----|-------|
|         | <chem>=O</chem> [c:8,t:5]                                                                                                                                                                                                              |                                |    |      |     |       |
| RU5004  | <chem>O=C1NN2C(=O)C3=CC=CC=C3N=C2C2=CC=CC=C12</chem> [c:8,10,13,18,t:6,16,20]                                                                                                                                                          | ChemDiv                        | 90 | 6.49 | 255 | -2.1  |
| RU5512  | <chem>OC(=O)C1CSC(N1)C1=CC(Br)=C(O)C(Br)=C1</chem> [c:16,t:9,12]                                                                                                                                                                       | ChemDiv                        | 87 | 3.00 | 264 | -6.3  |
| RU627   | <chem>OCCNCCNC1=CC=C(NCCNCCO)C2=C1C(=O)C1=C(O)C=CC(O)=C1C2=O</chem> [c:18,23,26,29,t:7,9]                                                                                                                                              | LightBiologicals               | 94 | 0.72 | 41  | 102.5 |
| RU646   | <chem>OC[C@H]1O[C@H](OC2=CC=CC3=C2C(=O)C2=C(O)C=C(C=C2[C@@H]3[C@H]2C3=CC=CC(O)[C@H]4O[C@H](CO)[C@@H](O)[C@H](O)[C@H]4O)=C3C(=O)C3=C(O)C=C(C=C23)C(O)=O)C(O)=O)[C@H](O)[C@@H](O)[C@@H]1O</chem> [c:8,10,15,18,20,28,43,48,51,t:6,26,53] | Spectrum                       | 82 | 8.76 | 278 | -13.5 |
| RU662   | <chem>CC[N+]=C(C2=CC=CC=C2)C2=CC(N)=CC=C2C2=CC=C(N)C=C12</chem> [c:2,6,8,14,16,t:4,11,19,21,24]                                                                                                                                        | Spectrum                       | 97 | 0.43 | 42  | 101.9 |
| RU6753  | <chem>CC1=NN2C(=N1)N=C(C)C(Br)=C2O</chem> [c:4,11,t:1,7]                                                                                                                                                                               | ChemDiv                        | 69 | 7.99 | 252 | -0.5  |
| RU803   | <chem>OC1=CC=C(C=C1N(=O)=O)N(=O)=O</chem> [c:3,5,t:1]                                                                                                                                                                                  | Spectrum                       | 96 | 0.87 | 260 | -4.7  |
| RU83653 | <chem>COC1=CC=CC2=C1C(=O)C1=C(O)C3=C(C[C@](O)(C[C@@H]3O)[C@H]3C[C@H](N)[C@H](O)[C@H](C)O3)C(C)=O)C(O)=C1C2=O</chem> [c:4,6,11,37,t:2,14]                                                                                               | Prestwick                      | 91 | 1.81 | 50  | 98.0  |
| RU84314 | <chem>C[C@@H]1O[C@H](C[C@H](N)[C@@H]1O)O[C@H]1C[C@@](O)(CC2=C(O)C3=C(C(O)=C12)C(=O)C1=CC=CC=C1C3=O)C(C)=O</chem> [c:16,19,30,32,t:22,2]                                                                                                | Sequoia Research Products Ltd. | 90 | 1.45 | 72  | 87.2  |

|         |                                                                                                                                                                             |           |    |      |     |      |
|---------|-----------------------------------------------------------------------------------------------------------------------------------------------------------------------------|-----------|----|------|-----|------|
|         | 8                                                                                                                                                                           |           |    |      |     |      |
| RU869   | CCN(CC)CCNC1=C<br>C=C(CO)C2=C1C(=O)<br>C1=CC=CC=C1S<br>2<br> c:14,21,23,t:8,10,19<br>                                                                                       | Spectrum  | 66 | 6.80 | 85  | 81.2 |
| RU871   | C[N+]1=CC2=C3OC<br>OC3=CC=C2C2=C1<br>C1=CC3=C(OCO3)<br>C=C1C=C2<br> c:3,9,11,14,25,28,t:<br>1,17,19                                                                         | Prestwick | 85 | 3.37 | 56  | 95.0 |
| RU891   | CC[C@@]1(O)C[C@H]<br>](O[C@H]2C[C@@H]<br>)([C@H](O)[C@H]<br>(C)O2)N(C)C)C<br>2=C(O)C3=C(C=C2[<br>C@H]1C(=O)OC)C(<br>=O)C1=CC=CC(O)=<br>C1C3=O<br> c:19,22,24,37,40,t:3<br>5 | Spectrum  | 98 | 1.42 | 65  | 90.6 |
| RU93687 | NC(=O)C1=C(NC(=O)<br>)CC#N)SC2=C1C<br>CCC2  c:3,12                                                                                                                          | Enamine   | 91 | 9.11 | 263 | -5.8 |
| RU94102 | CC(C)OC(=O)C(=C<br>C1=CC=C(O1)N(=O)<br>)=O)C#N  c:10,t:8                                                                                                                    | Enamine   | 64 | 8.14 | 267 | -8.1 |

**Supplementary Table 3. Structure activity relationship of analogs with potency of m-cGAS inhibition higher than RU166365**

Core Structure

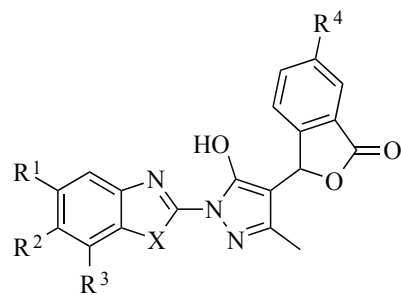

|                      | R <sup>1</sup> | R <sup>2</sup> | R <sup>3</sup> | X  | R <sup>4</sup> | IC <sub>50</sub> (μM) |
|----------------------|----------------|----------------|----------------|----|----------------|-----------------------|
| RU166365<br>"RU.365" | H              | H              | H              | NH | H              | 1.89                  |
| RU320521             | H              | Cl             | Cl             | NH | H              | 0.11                  |
| RU320582             | Cl             | H              | Cl             | NH | H              | 0.12                  |
| RU320467             | H              | H              | Br             | NH | H              | 0.38                  |
| RU320520             | H              | H              | Cl             | NH | H              | 0.62                  |
| RU320462             | H              | Br             | H              | NH | H              | 0.64                  |
| RU320461             | H              | Me             | H              | NH | H              | 0.86                  |
| RU320519             | H              | H              | Me             | NH | H              | 1.16                  |
| RU320469             | H              | H              | H              | NH | Br             | 1.32                  |
| RU320468             | H              | H              | H              | NH | OMe            | 1.43                  |
| RU281332             | H              | H              | H              | S  | H              | 1.79                  |

**Supplementary Table 4. Commercially available and in house synthesized analogs of RU166365 tested for m-cGAS inhibition**

| Molecule identifier | CXSMILES                                                                                                             | Vendor                   | IC <sub>50</sub> (μM) |
|---------------------|----------------------------------------------------------------------------------------------------------------------|--------------------------|-----------------------|
| RU320521            | <chem>CC1=NN(C2=NC3=CC=C(Cl)C(Cl)=C3N2)C(O)=C1C1OC(=O)C2=CC=CC=C12</chem>   c:12,18,27,t:1,4,6,8,25,29               | In house synthesized     | 0.11                  |
| RU320582            | <chem>CC1=NN(C2=NC3=CC(Cl)=CC(Cl)=C3N2)C(O)=C1C1OC(=O)C2=CC=CC=C12</chem>   c:9,12,18,27,t:1,4,6,25,29               | In house synthesized     | 0.12                  |
| RU320467            | <chem>CC1=NN(C2=NC3=CC=CC(Br)=C3N2)C(O)=C1C1OC(=O)C2=CC=CC=C12</chem>   c:8,11,17,26,t:1,4,6,24,28                   | In house synthesized     | 0.38                  |
| RU320520            | <chem>CC1=NN(C2=NC3=CC=CC(Cl)=C3N2)C(O)=C1C1OC(=O)C2=CC=CC=C12</chem>   c:8,11,17,26,t:1,4,6,24,28                   | In house synthesized     | 0.62                  |
| RU320462            | <chem>CC1=NN(C2=NC3=CC=C(Br)C=C3N2)C(O)=C1C1OC(=O)C2=CC=CC=C12</chem>   c:11,17,26,t:1,4,6,8,24,28                   | In house synthesized     | 0.64                  |
| RU320461            | <chem>CC1=NN(C2=NC3=CC=C(C)C=C3N2)C(O)=C1C1OC(=O)C2=CC=CC=C12</chem>   c:11,17,26,t:1,4,6,8,24,28                    | In house synthesized     | 0.86                  |
| RU320519            | <chem>CC1=NN(C2=NC3=CC=CC(C)=C3N2)C(O)=C1C1OC(=O)C2=CC=CC=C12</chem>   c:8,11,17,26,t:1,4,6,24,28                    | In house synthesized     | 1.16                  |
| RU320469            | <chem>CC1=NN(C2=NC3=CC=CC=C3N2)C(O)=C1C1OC(=O)C2=CC(Br)=CC=C12</chem>   c:8,10,16,26,t:1,4,6,23,28                   | In house synthesized     | 1.32                  |
| RU320468            | <chem>COC1=CC=C2C(OC(=O)C2=C1)C1=C(O)N(N=C1C)C1=NC2=CC=CC=C2N1</chem>   c:11,14,18,26,28,t:2,4,22,24                 | In house synthesized     | 1.43                  |
| RU281332            | <chem>CC1=NN(C2=NC3=CC=CC=C3S2)C(O)=C1C1OC(=O)C2=CC=CC=C12</chem>   c:8,10,16,25,t:1,4,6,23,27                       | Vitas-M Laboratory, Ltd. | 1.79                  |
| <b>RU166365</b>     | <b><chem>CC1=NN(C2=NC3=CC=CC=C3N2)C(O)=C1C1OC(=O)C2=C1C=CC=C2</chem>   c:8,10,16,23,26,28,t:1,4,6  </b>              | <b>ChemBridge</b>        | <b>1.89</b>           |
| RU320464            | <chem>CC1=NN(C2=NC3=CC=CC=C3N2)C(O)=C1C1OC(=O)C2=CC=C(Br)C=C12</chem>   c:8,10,16,t:1,4,6,23,25,28                   | In house synthesized     | 2.24                  |
| RU320575            | <chem>CC1=NN(C2=NC3=CC=CC(=C3N2)C2=CC=CC=C2)C(O)=C1C1OC(=O)C2=CC=CC=C12</chem>   c:8,10,17,19,23,32,t:1,4,6,15,30,34 | In house synthesized     | 2.35                  |
| RU320579            | <chem>COC(=O)CC1=CC=CC2=C1C(=O)OC2C1=C(O)N(N=C1C)C1=NC2=CC=CC=C2N1</chem>   c:7,9,17,21,29,31,t:5,25,27              | In house synthesized     | 2.46                  |
| RU320463            | <chem>CC1=NN(C2=NC3=CC=CC=C3N2)C(O)=C1C1OC(=O)C2=C1C=CC=C2Br</chem>   c:8,10,16,23,26,28,t:1,4,6                     | In house synthesized     | 2.76                  |
| RU320581            | <chem>CC1=NN(C2=NC3=CC=CC(=C3N2)C(F)(F)F)C(O)=C1C1OC(=O)C2=CC=CC=C12</chem>   c:8,10,20,29,t:1,4,6,27,31             | In house synthesized     | 3.30                  |
| RU320578            | <chem>CC1=NN(C2=NC3=CC=C(C=C3N2)C2=CC=CC=C2)C(O)=C1C1OC(=O)C2=CC=CC=C12</chem>   c:8,10,17,19,23,32,t:1,4,6,15,30,34 | In house synthesized     | 3.36                  |
| RU320460            | <chem>COC1=C2NC(=NC2=CC=C1)N1N=C(C)C(C2OC(=O)C3=CC=C(C=C23)=C1O</chem>   c:2,5,8,10,24,29,t:14,22,26                 | In house synthesized     | 5.61                  |
| RU320511            | <chem>COC(=O)C1=CC=CC2=C1C(=O)OC2C1=C(O)N(N=C1C)C1=NC2=CC=CC=C2N1</chem>   c:6,8,16,20,28,30,t:4,24,26               | In house synthesized     | 6.84                  |
| RU320515            | <chem>CC(C)C1=NN(C2=NC3=CC=CC=C3N2)C(O)=C1C1OC(=O)C2=CC=CC=C12</chem>   c:10,12,18,27,t:3,6,8,25,29                  | In house synthesized     | 7.16                  |

|          |                                                                                                          |                          |       |
|----------|----------------------------------------------------------------------------------------------------------|--------------------------|-------|
| RU320459 | <chem>COC1=CC=C2N=C(NC2=C1)N1N=C(C)C(C2OC(=O)C3=CC=C(C=C23)=C1O</chem>  c:6,10,24,29,t:2,4,14,22,26      | In house synthesized     | 7.34  |
| RU320512 | <chem>COC(=O)C1=CC=C2C(=O)OC(C2=C1)C1=C(O)N(N=C1C)C1=NC2=CC=CC=C2N1</chem>  c:13,16,20,28,30,t:4,6,24,26 | In house synthesized     | 8.58  |
| RU320502 | <chem>CC1=NN(C2=NC3=NC=CC=C3N2)C(O)=C1C1OC(=O)C2=CC=CC=C12</chem>  c:8,10,16,25,t:1,4,6,23,27            | In house synthesized     | 11.01 |
| RU320577 | <chem>CC1=NN(C2=NC3=CC=C(C=C3N2)C(O)=O)C(O)=C1C1OC(=O)C2=CC=CC=C12</chem>  c:8,10,19,28,t:1,4,6,26,30    | In house synthesized     | 18.04 |
| RU320504 | <chem>CC1=NN(C2=NC3=CC=CC=C3N2)C(O)=C1C1OC(=O)C2=CC=CC(Br)=C12</chem>  c:8,10,16,25,t:1,4,6,23,28        | In house synthesized     | 19.63 |
| RU166418 | <chem>CCCC1=C(O)N(N=C1C)C1=NC2=CC=CC=C2N1</chem>  c:3,7,15,17,t:11,13                                    | Vitas-M Laboratory, Ltd. | >25   |
| RU281319 | <chem>CC1=CC=C(C=C1)C1=NN(C(O)=C1)C1=NC2=CC=CC=C2N1</chem>  c:3,5,12,19,21,t:1,8,15,17                   | InterBioScreen Ltd.      | >25   |
| RU281324 | <chem>CC1=NN(C(O)=C1)C1=NC2=CC=CC=C2N1</chem>  c:5,12,14,t:1,8,10                                        | Vitas-M Laboratory, Ltd. | >25   |
| RU320465 | <chem>CC1=NN(C2=NC3=CC=CC=C3N2)C(O)=C1C1NC(=O)C2=CC=CC=C12</chem>  c:8,10,16,25,t:1,4,6,23,27            | In house synthesized     | >25   |
| RU320466 | <chem>CC1=NN(C2=NC3=CC=CC=C3S2)C(O)=C1C1NC(=O)C2=CC=CC=C12</chem>  c:8,10,16,25,t:1,4,6,23,27            | In house synthesized     | >25   |
| RU320503 | <chem>COC1=CC=CC2=C1C(OC2=O)C1=C(O)N(N=C1C)C1=NC2=CC=CC=C2N1</chem>  c:4,6,14,18,26,28,t:2,22,24         | In house synthesized     | >25   |
| RU320513 | <chem>COC(=O)C1=CC=CC2=C1C(OC2=O)C1=C(O)N(N=C1C)C1=NC2=CC=CC=C2N1</chem>  c:6,8,16,20,28,30,t:4,24,26    | In house synthesized     | >25   |
| RU320514 | <chem>CC(C)C1=C(C2OC(=O)C3=CC=CC=C23)C(O)=NN1C1=NC2=C(C=CC=C2N1</chem>  c:3,11,18,26,28,t:9,13,22,24     | In house synthesized     | >25   |
| RU320516 | <chem>CC1=NN(C2=NC3=CC=CC=C3N2)C(O)=C1C1OC(=O)C2=CC=CC(C(O)=O)=C12</chem>  c:8,10,16,25,t:1,4,6,23,30    | In house synthesized     | >25   |
| RU320517 | <chem>CC(=O)N1CCC2=C(C1C1=CC=CC=C1)C(C)=NN2C1=NC2=CC=CC=C2N1</chem>  c:6,12,14,18,26,28,t:10,22,24       | In house synthesized     | >25   |
| RU320518 | <chem>CC(=O)N1CCC2=NN(C3=NC4=CC=CC=C4N3)C(C)=C2C1C1=CC=CC=C1</chem>  c:13,15,21,28,30,t:6,9,11,26        | In house synthesized     | >25   |
| RU320574 | <chem>CC1=NN(C2=NC=C(N2)C2=CC=CC=C2)C(O)=C1C1OC(=O)C2=CC=CC=C12</chem>  c:6,12,14,18,27,t:1,4,10,25,29   | In house synthesized     | >25   |

**Supplementary Table 5. Nucleic acids used in this study**

| Sequences used for dsDNA and hairpin RNA                                         |                                                        |
|----------------------------------------------------------------------------------|--------------------------------------------------------|
| dsDNA                                                                            |                                                        |
| 45.50 (top)                                                                      | 5' -TACAGATCTACTAGTGATCTATGACTGATCTGTACATGATCTACA      |
| 45.52 (bottom)                                                                   | 5' -TGTAGATCATGTACAGATCAGTCATAGATCACTAGTAGATCTGTA      |
| crystal (top)                                                                    | 5' -AAATTGCCGAAGACGAA                                  |
| crystal (bottom)                                                                 | 5' -TTTCGTCTTCGGCAATT                                  |
| hairpin RNA                                                                      |                                                        |
| (HP20) 5'-ppp20L                                                                 | 5' ppp-GGAUCGAUCGAUCGAUCGGCUUCGGCCGAUCGAUCGAUCGAUCC-3' |
| Primer sequences used for qRT-PCR                                                |                                                        |
| Actb1                                                                            |                                                        |
| F                                                                                | 5' -CCCTAAGGCCAACCGTGAAAAG                             |
| R                                                                                | 5' -AGAGGCATACAGGGACAGCA                               |
| Il-6                                                                             |                                                        |
| F                                                                                | 5' -CTTCACAAGTCGGAGGCTTAA                              |
| R                                                                                | 5' -ACTCCAGGTAGCTATGGTACTC                             |
| Ifnb1                                                                            |                                                        |
| F                                                                                | 5' -GAGTTACACTGCCTTTGCCATCC                            |
| R                                                                                | 5' -ACTGTCTGCTGGTGGAGTTCAT                             |
| Primer sequences used for cloning of recombinant cGAS for use in crystal studies |                                                        |
| F                                                                                | 5' -GACGGATCCCCGGACAAGCTAAAGAAGGTGC                    |
| R                                                                                | 5' -GATGCGGCCGCTCAAAGCTTGTCAAAAATTGG                   |
